# Supplementary material for: Potential for Applying Continuous Directed Evolution to Plant Enzymes: An Exploratory Study
Source: PubMed Central journal article supplement (PMC7555113; doi:10.3390/life10090179), 2020-09-05

## SUPPLEMENTARY INFORMATION

**Table S1.** Primers used in the present work.

| No. of primer | Name                   | Sequence 5' - 3'                   |
|---------------|------------------------|------------------------------------|
| 1             | ScTHI4_Nsil_Fw         | CGATATGCATTCTGCTACCTCTACTGCTA      |
| 2             | ScTHI4_SphI_Rv         | ATCGGCATGCCTAAGCAGCAAAGTGTTTC      |
| 3             | TP DNAP1_AREC318_WT_FW | GGTAGACCAAACCATGACTTTGG            |
| 4             | TP DNAP1_AREC318_WT_Rv | CCACAATGAGTTCATGATGAT              |
| 5             | TP DNAP1_AREC611_ep_Rv | CACAACAATTTATCAAATTCACATTCTAATTCAG |
| 6             | TP DNAP1_AREC633_ep_Rv | GATCAACATGAAGTCTGTATCGTT           |
| 7             | TvThi4F1               | TAGCGAGCGAAGTTGTTATTAGCG           |
| 8             | TvThi4R1               | AAACCGCTAATAACAACCTTCGCTC          |
| 9             | TvThi4F2               | TAGCGATGTGGCGATTGTGGGGTG           |
| 10            | TvThiR2                | AAACCCACCCACAATCGCCACATC           |
| 11            | TvThi4F3               | TAGCGACGTTCGAAGATCGCCACA           |
| 12            | TvThi4R3               | AAACTGTGGCGATCTTCGAACGTC           |
| 13            | TvThi4F4               | TAGCCGAGATCGTGGTTCAGGAGA           |
| 14            | TvThi4R4               | AAACTCTCCTGAACCACGATCTCG           |
| 15            | TvThi4F5               | TAGCATTTAAGCCGGGTTACTATC           |
| 16            | TvThi4R5               | AAACGATAGTAACCCGGCTTAAAT           |
| 17            | TvThi4F6               | TAGCGCGGGTGCGACCGTGTTTAA           |
| 18            | TvThi4R6               | AAACTTAAACACGGTTCGCACCCGC          |
| 19            | TvThi4F7               | TAGCAACGGTCAATACCGTGTGTG           |
| 20            | TvThi4R7               | AAACCACACACGGTATTGACCGTT           |
| 21            | TvThi4F8               | TAGCTGGTTGGCGAGAAACCGCTG           |
| 22            | TvThi4R8               | AAACCAGCGGTTTCTCGCCAACCA           |
| 23            | TvThi4F9               | TAGCGAACAGCAAAGAAGTGTTC            |
| 24            | TvThi4R9               | AAACGGAACACTTCTTTGCTGTTC           |
| 25            | TvThi4F10              | TAGCCGGTAGCCACCGTATGGGTC           |
| 26            | TvThi4R10              | AAACGACCCATACGGTGGCTACCG           |
| 27            | TvThi4F11              | TAGCAAAGGTGGCGGAGGAGATTG           |
| 28            | TvThi4R11              | AAACCAATCTCCTCCGCCACCTTT           |
| 29            | 1944ThermThi4F1F       | TAGCGGTTATTACCGCGAAATATG           |
| 30            | 1945ThermThi4F1R       | AAACCATATTTTCGCGGTAATAACC          |
| 31            | 1946ThermThi4F2F       | TAGCGGTTAGCACCTGCAGCGTA            |
| 32            | 1947ThermThi4R2R       | AAACTACGCTGCAGGGTGCTAACC           |

**Table S2. Compositions of buffers used in the protoplast fusion protocol.** Except for CaCl<sub>2</sub>, all components were diluted in Milli-Q water and autoclaved. A stock of 0.5 M CaCl<sub>2</sub> was sterilized by filtration (0.22 µm pore diameter membrane) and an appropriate aliquot was added to sterile Buffers II and III.

| Buffer components                | Concentration |
|----------------------------------|---------------|
| <b>Buffer I, pH 6.1</b>          |               |
| Citric Acid                      | 14 mM         |
| Na <sub>2</sub> HPO <sub>4</sub> | 51 mM         |
| KCl                              | 600 mM        |
| EDTA dipotassium                 | 10 mM         |
| <b>Buffer II</b>                 |               |
| PEG-3350                         | 33% (w/v)     |
| KCl                              | 600 mM        |
| CaCl <sub>2</sub>                | 50 mM         |
| <b>Buffer III</b>                |               |
| KCl                              | 600 mM        |
| CaCl <sub>2</sub>                | 50 mM         |

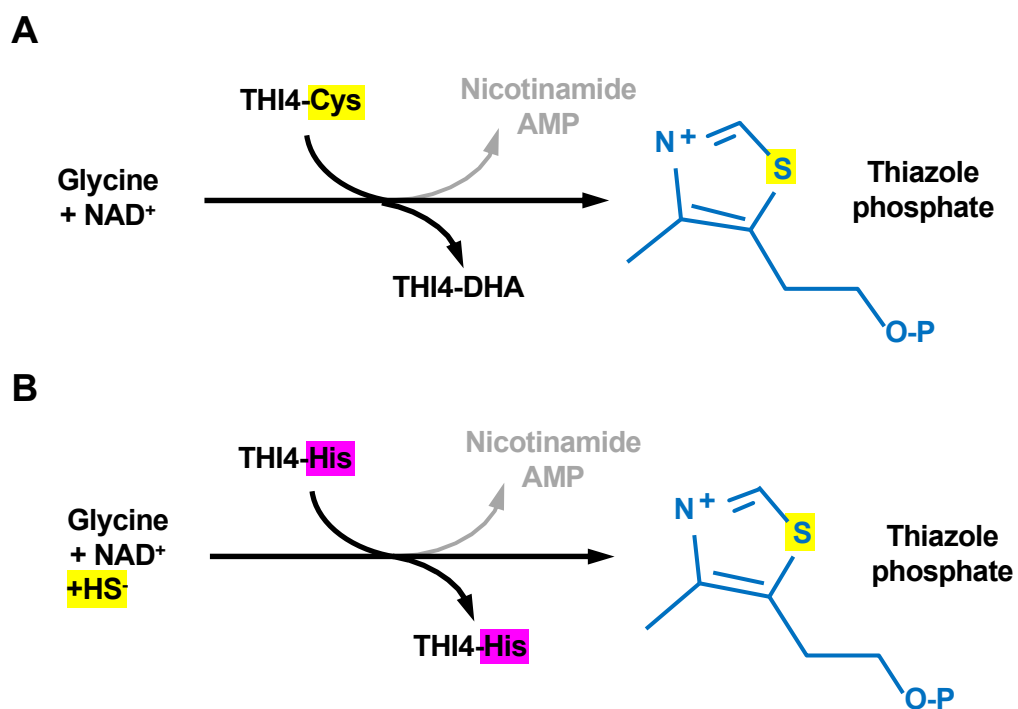

**Figure S1.** Reaction mechanisms of suicidal and non-suicidal THI4. In plant thiazole synthesis, THI4 uses NAD<sup>+</sup>, glycine, and a sulfur atom from an active-site cysteine residue. In this process, this cysteine is converted to dehydroalanine (DHA) and the inactive, DHA-containing THI4 is degraded (A). Thermovibrio ammonificans THI4 contains a histidine in place of the active site-cysteine and is truly catalytic, using sulfide (HS<sup>-</sup>) as the sulfur donor (B).

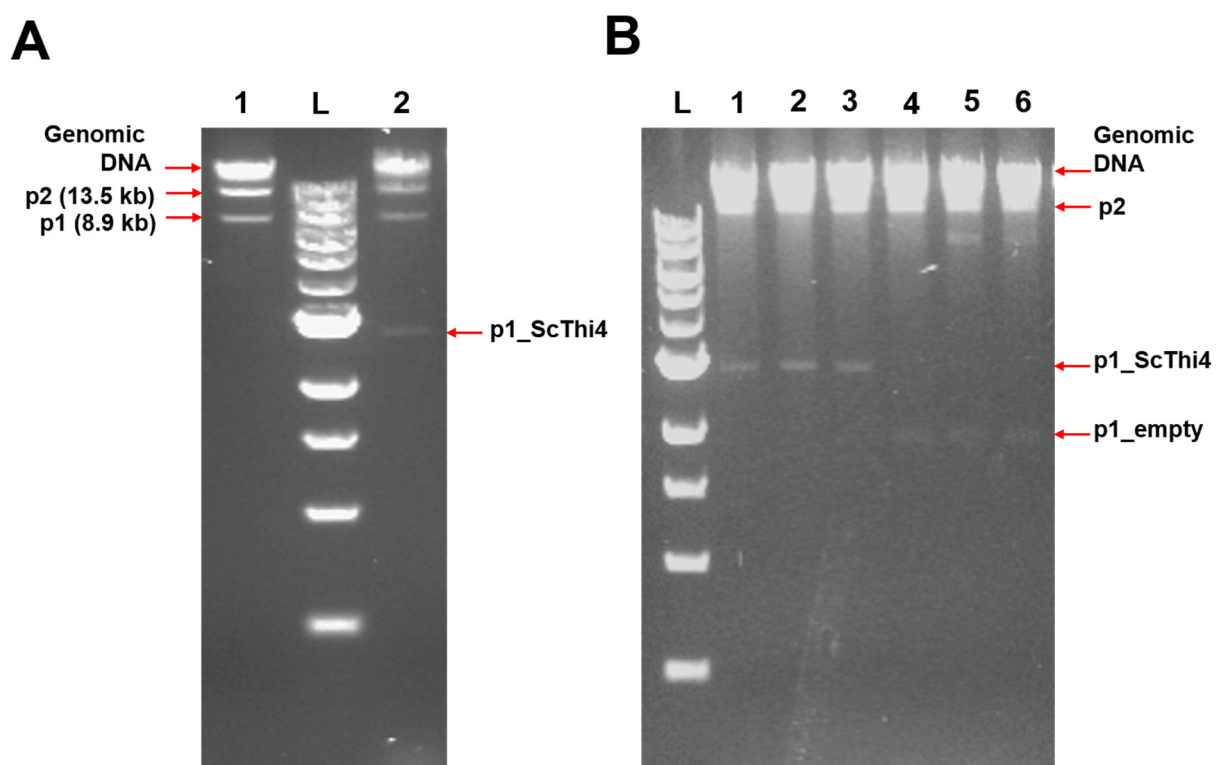

**Figure S2. Gel analysis of DNA extracted from different yeast strains.** DNA was separated by 1% (w/v) agarose gel. Lanes marked L contained a 1kb DNA ladder. **(A)** DNA from the GA-Y319 strain contained the wild type p1 (8.9 kb) and p2 (13.5 kb) linear plasmids (Lane 1). After transformation of GA-Y319 cells with a digested p1\_ScTHI4 integration vector, an additional band corresponding to the recombinant p1\_ScTHI4 (3.05 kb) was detected (Lane 2). **(B)** Screening of  $\Delta$ THI4 BY4741 clones after protoplast fusion. DNA from different clones contained the linear plasmids p1\_ScTHI4 (lanes 1-3) or p1\_empty (lanes 4-6).

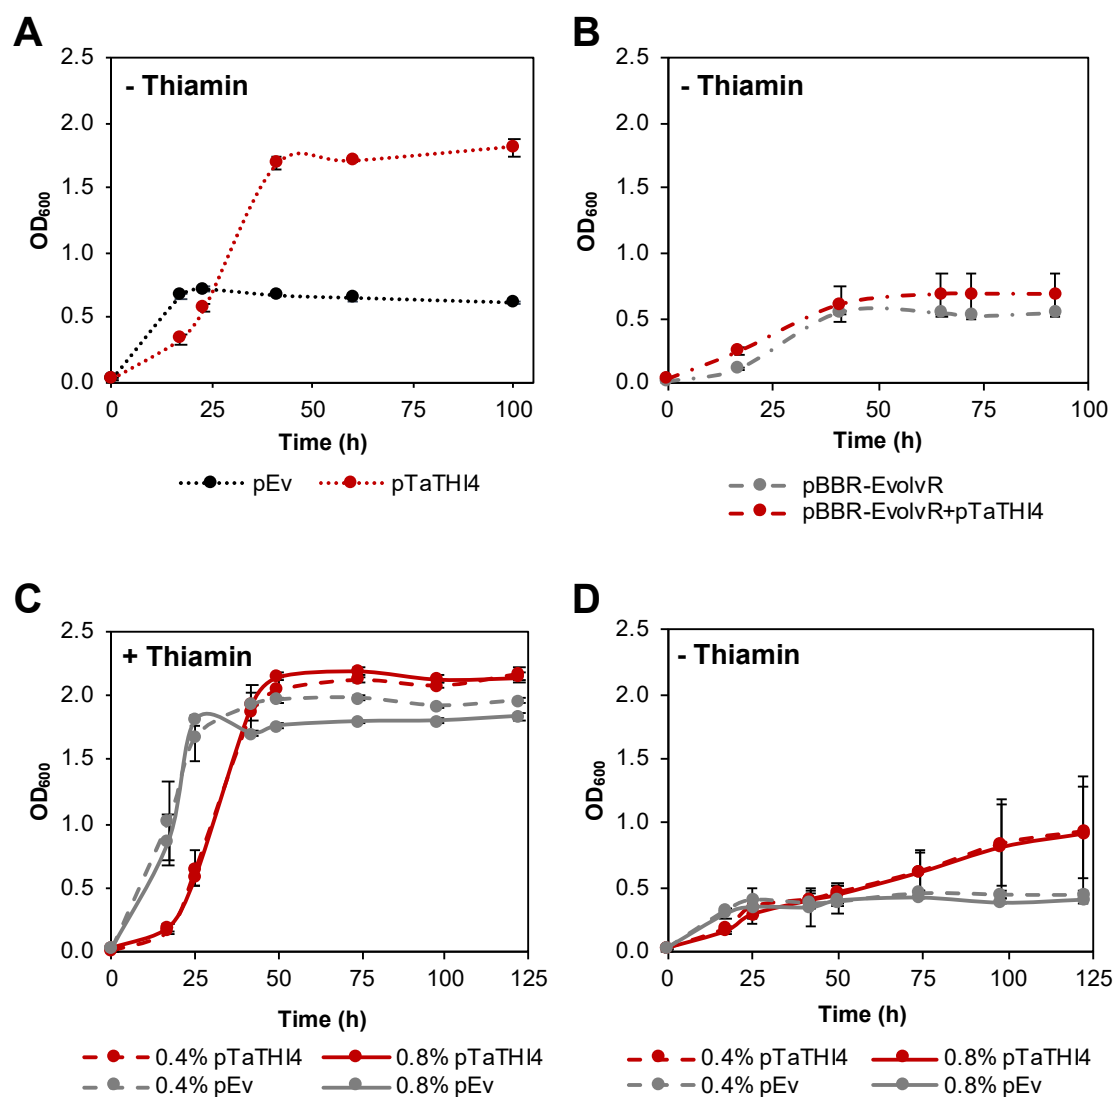

**Figure S3.** Troubleshooting the complementation of an *E. coli*  $\Delta thiG$  strain by TaTHI4 using a modified EvolvR plasmid and different carbon sources. *E. coli*  $\Delta thiG$  cells harboring the pCDFDuet-placO vector alone (pEv) or containing the TaTHI4 (pTaTHI4) gene were cultured in MOPS minimal medium containing 0.2% (w/v) glycerol, 1 mM IPTG, and 1 mM cysteine without 100 nM thiamin (A).  $\Delta thiG$  cells harboring a modified pEvolvR vector (pBBR backbone) with or without pTaTHI4 were cultured in MOPS minimal medium plus glycerol, cysteine, and IPTG as above, without 100 nM thiamin (B). *E. coli*  $\Delta thiG$  cells were cultured as in (A) but replacing glycerol with either 0.4% or 0.8% (w/v) glucose as indicated, with 100 nM thiamin (C) or without thiamin (D). Values are means  $\pm$  standard error (SE) of three independent replicates. Where no error bars appear, they are smaller than the symbol.

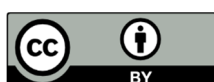

Supplement: life-10-00179-s001.pdf [file life-10-00179-s001.pdf]
